# Supplementary material for: Passive Immunization with Recombinant Antibody VLRB-PirAvp/PirBvp—Enriched Feeds against Vibrio parahaemolyticus Infection in Litopenaeus vannamei Shrimp
Source: Vaccines (Basel). 2021 Jan 16;9(1):55. doi: 10.3390/vaccines9010055 (PMC7829966; doi:10.3390/vaccines9010055)
Supplement: Supplementary file 1 [file vaccines-09-00055-s001.pdf]

Supplementary figure 1.

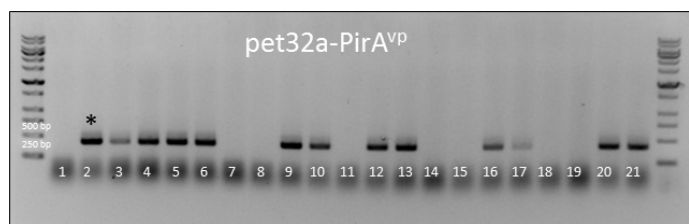

\* Correct sequence.

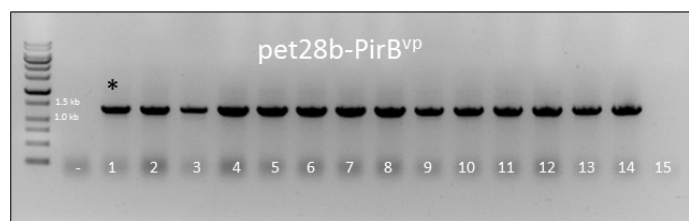

\* Correct sequence.

**Supplementary Figure 1. Colony PCR to check proper cloning of pet32a-PirA<sup>vp</sup> and pet28b-PirB<sup>vp</sup>.** Checking presence of inserts by amplifying the cloning site using gene-specific primers. Band size 336 bp and 1317 bp were observed, which correspond to **PirA<sup>vp</sup>** and **PirB<sup>vp</sup>**, respectively. One clone from each gene was sent for sequencing to further check the identity of the gene inserted in the plasmid.
